# Supplementary material for: Cannabis-Based Oral Emulsion for Medical Purposes to Meet the Needs of Patients: Formulation, Quality and Stability
Source: MDPI journal article supplement (doi:10.3390/pharmaceutics14030513), 2022-02-25
Supplement: s1 [file s1]

**Figure S1 - Reference chromatograms for THC and CBD analytical standards,  $\beta$ -4 oil and 2T emulsions**

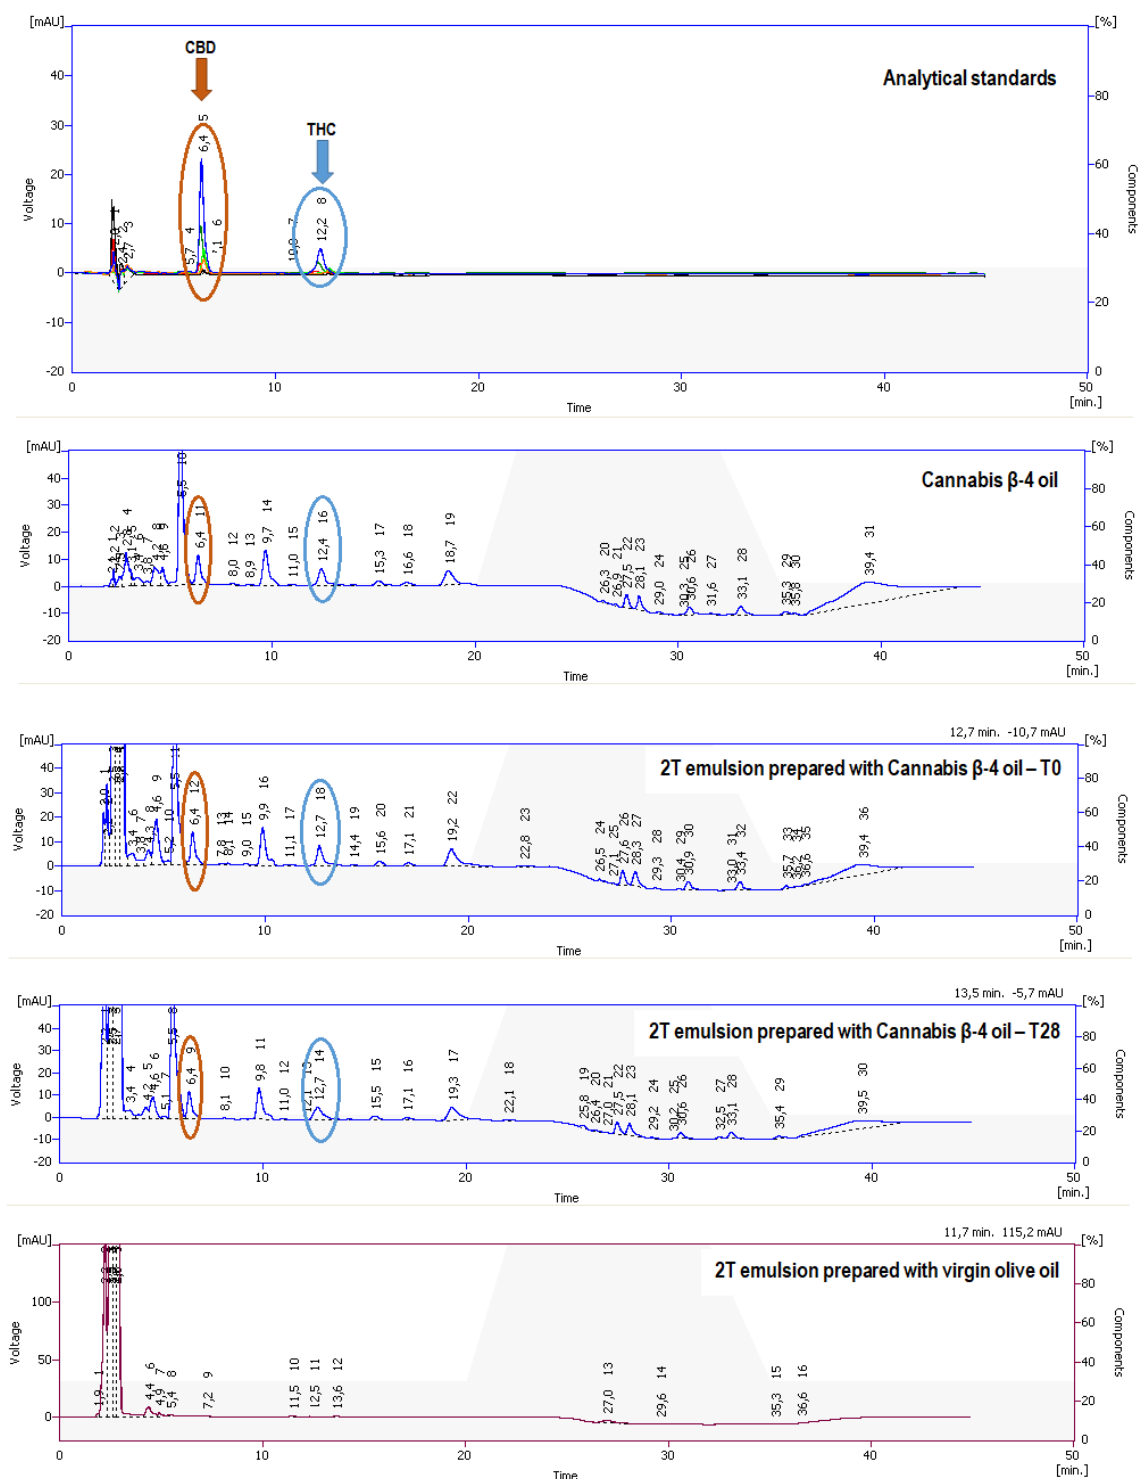

Table S1 - results obtained from the 2T emulsions quantitative analyzes

|             | 2T EMULSIONS                                       |                                                        |            |       |                                                 |                                                     |                                                    |                                                        |            |       |                                                 |                                                     |
|-------------|----------------------------------------------------|--------------------------------------------------------|------------|-------|-------------------------------------------------|-----------------------------------------------------|----------------------------------------------------|--------------------------------------------------------|------------|-------|-------------------------------------------------|-----------------------------------------------------|
|             | THC                                                |                                                        |            |       |                                                 |                                                     | CBD                                                |                                                        |            |       |                                                 |                                                     |
|             | THC expected concentration in the emulsions (mg/g) | THC experimental concentration in the emulsions (mg/g) | mean value | SD    | percentage variation compared to the mean value | percentage variation compared to the expected value | CBD expected concentration in the emulsions (mg/g) | CBD experimental concentration in the emulsions (mg/g) | mean value | SD    | percentage variation compared to the mean value | percentage variation compared to the expected value |
| T0 LOTTO A  | 0,93                                               | 0,94                                                   | 0,93       | 0,051 | 1,25                                            | 1,77                                                | 1,10                                               | 1,14                                                   | 1,15       | 0,036 | -0,79                                           | 3,89                                                |
|             |                                                    | 0,86                                                   |            |       | -7,32                                           | -6,85                                               |                                                    | 1,17                                                   |            |       | 2,12                                            | 6,94                                                |
|             |                                                    | 0,87                                                   |            |       | -6,38                                           | -5,90                                               |                                                    | 1,18                                                   |            |       | 2,89                                            | 7,74                                                |
| T0 LOTTO B  |                                                    | 0,94                                                   |            |       | 0,90                                            | 1,42                                                |                                                    | 1,20                                                   |            |       | 4,62                                            | 9,55                                                |
|             |                                                    | 1,01                                                   |            |       | 8,54                                            | 9,09                                                |                                                    | 1,14                                                   |            |       | -0,99                                           | 3,68                                                |
|             |                                                    | 0,90                                                   |            |       | -2,86                                           | -2,36                                               |                                                    | 1,12                                                   |            |       | -2,81                                           | 1,77                                                |
| T0 LOTTO C  |                                                    | 1,00                                                   |            |       | 7,01                                            | 7,56                                                |                                                    | 1,16                                                   |            |       | 0,76                                            | 5,51                                                |
|             |                                                    | 0,90                                                   |            |       | -3,45                                           | -2,95                                               |                                                    | 1,09                                                   |            |       | -5,66                                           | -1,21                                               |
|             |                                                    | 0,95                                                   |            |       | 2,31                                            | 2,83                                                |                                                    | 1,15                                                   |            |       | -0,15                                           | 4,56                                                |
| T28 LOTTO A |                                                    | 0,85                                                   | 0,92       | 0,058 | -7,53                                           | -7,67                                               |                                                    | 1,21                                                   | 1,15       | 0,043 | 4,59                                            | 9,95                                                |
|             |                                                    | 0,90                                                   |            |       | -2,21                                           | -2,36                                               |                                                    | 1,17                                                   |            |       | 0,99                                            | 6,17                                                |
|             |                                                    | 0,91                                                   |            |       | -1,50                                           | -1,65                                               |                                                    | 1,10                                                   |            |       | -4,6                                            | 0,3                                                 |
| T28 LOTTO B | 0,96                                               | 4,18                                                   |            |       | 4,01                                            | 1,18                                                | 2,31                                               | 7,56                                                   |            |       |                                                 |                                                     |
|             | 0,95                                               | 2,29                                                   |            |       | 2,13                                            | 1,18                                                | 2,5                                                | 7,76                                                   |            |       |                                                 |                                                     |
|             | 1,01                                               | 8,91                                                   |            |       | 8,74                                            | 1,15                                                | -0,15                                              | 4,98                                                   |            |       |                                                 |                                                     |
| T28 LOTTO C | 0,86                                               | -6,46                                                  |            |       | -6,61                                           | 1,11                                                | -3,65                                              | 1,29                                                   |            |       |                                                 |                                                     |
|             | 0,87                                               | -6,11                                                  |            |       | -6,26                                           | 1,20                                                | 3,54                                               | 8,86                                                   |            |       |                                                 |                                                     |
|             | 1,00                                               | 8,44                                                   |            |       | 8,26                                            | 1,09                                                | -5,54                                              | -0,7                                                   |            |       |                                                 |                                                     |
